# Supplementary material for: Maternal variants in NLRP and other maternal effect proteins are associated with multilocus imprinting disturbance in offspring
Source: PubMed Central journal article supplement (PMC6047157; doi:10.1136/jmedgenet-2017-105190), 2018-03-24
Supplement: jmedgenet-2017-105190supp001.pdf [file jmedgenet-2017-105190supp001.pdf]

**Supplementary Table 1: genomic variants in pedigrees affected by multi-locus imprinting disorder**

| Family number | ID <sup>1</sup> | variant location (hg38) <sup>2</sup> | gene  | variant info <sup>3</sup>                        | dbSNP ID <sup>4</sup> | ExAC_ALL <sup>5</sup> | ExAC_ethnicity <sup>6</sup> | gnomAD All <sup>7</sup> | SIFT <sup>8</sup> | PolyPhen2 <sup>9</sup> | PROVEAN <sup>10</sup> | hypergeometric P-value <sup>11</sup> |
|---------------|-----------------|--------------------------------------|-------|--------------------------------------------------|-----------------------|-----------------------|-----------------------------|-------------------------|-------------------|------------------------|-----------------------|--------------------------------------|
| 1             | BWS             | Chr19:54939444-54939445:delAG        | NLRP2 | NM_017852.4:c.1479_1480del, p.(Arg493SerfsTer32) | rs758760659           | -                     | -                           | 0.0073%                 | -                 | -                      | -                     | 0.016                                |
| 2             | SRS             | Chr19:54986185:delA                  | NLRP2 | NM_017852.4:c.2237del, p.(Asn746ThrfsTer4)       | -                     | -                     | -                           | 0.00041%                | -                 | -                      | -                     |                                      |
| 3             | idiopathic      | Chr19:54994418-54994419:delTG        | NLRP2 | NM_017852.4:c.2860_2861del, p.(Cys954GlnfsTer18) | -                     | -                     | -                           | -                       | -                 | -                      | -                     |                                      |
| 4             | TNDM            | Chr19:54974533:C:T                   | NLRP2 | NM_017852.4:c.314C>T, p.(Pro105Leu)              | rs201724086           | 0.0000165             | 0.000015                    | 0.0028%                 | T (0.15)          | PD (668)               | N(-2.07)              |                                      |
| 5             | SRS             | Chr19:54983583:T:C                   | NLRP2 | NM_017852.4:c.1885T>C, p.(Ser629Pro)             | rs147213467           | 0.0009                | 0.0016                      | 0.099%                  | D (0)             | D (0.911)              | D(-3.55)              |                                      |
|               |                 | Chr19:54990056:G:A                   | NLRP2 | NM_017852.4:c.2401G>A, p.(Ala801Thr)             | rs117066658           | 0.0093                | 0.0136                      | 0.97%                   | T (0.51)          | B (0.099)              | T(-1.42)              |                                      |
| 6             | BWS             | Chr19:54936400:C:T                   | NLRP7 | NM_001127255.1:c.2161C>T, p.(Arg721Trp)          | rs104895525           | 0.0001214             | 0.00001502                  | 0.0057%                 | T (0.08)          | B (0.109)              | D(-4.13)              | 0.021                                |
|               |                 | Chr19:55445006:A:G                   | NLRP7 | NM_001127255.1:c.2573T>C, p.(Ile858Thr)          | rs776102152           | -                     | -                           | 0.0069%                 | D (0)             | B (0.046)              | D(-2.91)              |                                      |
| 7             | BWS/<br>TNDM    | Chr19:54940070:A:C                   | NLRP7 | NM_001127255.1:c.749T>G, p.(Phe250Cys)           | rs78096121            | 0.0003954             | 0.0006443                   | 0.046%                  | D (0)             | D (0.978)              | D(-7.04)              |                                      |
|               |                 | Chr19:54939715:A:C                   | NLRP7 | NM_001127255.1:c.1104T>G, p.(Ile368Met)          | rs1654636             | 0.0005806             | 0.0006753                   | 0.048%                  | T (0.24)          | B (0.06)               | N(-0.91)              |                                      |
| 8             | SRS             | chr19:54936405:G:A                   | NLRP7 | NM_001127255.1:c.2156C>T, p.(Ala719Val)          | rs104895526           | 0.001189              | 0.001938                    | 0.10%                   | T (0.06)          | PD (0.611)             | D(-2.61)              |                                      |
| 9             | SRS             | Chr1:17388820:G:A                    | PADI6 | NM_207421.4:c.902G>A, p.(Arg301Gln)              | rs755969432           | 0.0000171             | 0.0000308                   | 0.0020%                 | D (0)             | D (1)                  | D(-3.633)             | 5.00E-17                             |
|               |                 | Chr1:17394415:C:T                    | PADI6 | NM_207421.3:c.1298C>T, p.(Pro433Leu)             | rs759006424           | 0.0000515             | 0.0000774                   | 0.0041%                 | D (0)             | D (1)                  | D(-9.143)             |                                      |
| 10            | BWS             | Chr1:17397091:G:A                    | PADI6 | NM_207421.3:c.1639G>A, p.(Asp547Asn)             | rs150981529           | 0.0007                | 0.0012                      | 0.056%                  | T (1)             | B (0.006)              | N(1.738)              |                                      |
|               |                 | Chr1:17394024:T:C                    | PADI6 | NM_207421.3:c.1124T>C, p.(Leu375Ser)             | -                     | -                     | -                           | 0.00041%                | D (0.01)          | PD (0.88)              | D(-3.112)             |                                      |
| 11            | SRS             | Chr1:17392197:A:G                    | PADI6 | NM_207421.3:c.1046A>G, p.(Asp349Gly)             | -                     | -                     | -                           | -                       | T (0.37)          | PD (0.953)             | D(-2.969)             |                                      |
| 12            | SRS             |                                      | PADI6 | NM_207421.3:c.433A>G, p.(Lys145Glu)              | -                     | -                     | -                           | -                       | -                 | -                      | -                     | -                                    |
| 13            | TNDM            | Chr6:73369684:G:A                    | OOEP  | NM_001080507.2:c.109C>T, p.(Arg37Trp)            | rs189355507           | 0.0000166             | 0.0001161                   | 0.00081%                | D (0.04)          | D (0.998)              | D(-3.6)               | 0.084                                |
| 14            | SRS             | Chr19:4930782:G:A                    | UHRF1 | NM_013282.4:c.514G>A, p.(Val172Met)              | rs753942436           | 0.00000837            | 0.0000152                   | 0.00041%                | D (0)             | D (0.958)              | N(-2.13)              | 0.12                                 |
| 15            | BWS             | Chr4:48492438:G:T                    | ZAR1  | NM_175619.2:c.130G>T, p.(Glu44Cys)               | -                     | -                     | -                           | -                       | D (0.01)          | PD (0.748)             | N (-2.45)             | 0.12                                 |

The table summarises rare genomic variants found in maternal-effect genes, in pedigrees affected by MLID. 1. the clinical presentation for which the proband was initially referred for genetic testing (BWS: Beckwith-Wiedemann syndrome; SRS: Silver-Russell syndrome; TNDM: transient neonatal diabetes mellitus). 2. the genomic location of the variant annotated in hg38/GRCh38. 3. the location of the variant in the major gene transcript (Genbank locus), exon, nucleotide change and amino-acid change. 4. SNP ID (dbSNP147). 5. minor allele frequency in ExAC (accessed June 2017). 6. minor allele frequency according to ExAC in the ethnicity of the pedigree. 7. minor allele frequency in GnomAD (accessed October 2017). 8. SIFT: D=deleterious (0-0.05); T=tolerated (0.05-1). 9. PolyPhen2: D=damaging (0.956-1); PD=possibly damaging (0.453-0.956); B=benign (0-0.453). 10. PROVEAN: D=deleterious (<-2.5); N=neutral (>-2.5). 11. Hypergeometric P-value (ExAC-all) for variants with MAF<0.001
